# Supplementary material for: TDP-43 proteinopathy impairs mRNP granule mediated postsynaptic translation and mRNA metabolism
Source: Theranostics. 2021 Jan 1;11(1):330–45. doi: 10.7150/thno.51004 (PMC7681104; doi:10.7150/thno.51004)
Supplement: Supplementary file 1 — Supplementary figures. [file thnov11p0330s1.pdf]

Supplementary information

**TDP-43 proteinopathy impairs mRNP granule mediated postsynaptic  
translation and mRNA metabolism**

Chia-En Wong<sup>1,2</sup>, Lee-Way Jin<sup>3</sup>, Yuan-Ping Chu<sup>2</sup>, Wei-Yen Wei<sup>2</sup>, Pei-Chuan Ho<sup>2</sup> and  
Kuen-Jer Tsai<sup>2,4\*</sup>

<sup>1</sup> Department of Medicine, College of Medicine, National Cheng Kung University,  
Tainan, Taiwan

<sup>2</sup> Institute of Clinical Medicine, College of Medicine, National Cheng Kung  
University, Tainan, Taiwan

<sup>3</sup> Department of Pathology and Laboratory Medicine, UC Davis Medical Center,  
California, USA

<sup>4</sup> Research Center of Clinical Medicine, National Cheng Kung University Hospital,  
College of Medicine, National Cheng Kung University, Tainan, Taiwan

**Correspondence to:** Kuen-Jer Tsai, Ph.D.  
Institute of Clinical Medicine  
College of Medicine  
National Cheng Kung University  
Tainan, Taiwan  
Tel: +886-6-2353535-4254  
Fax: +886-6-2758781  
Email: kjtsai@mail.ncku.edu.tw

Supplementary Figure S2 is associated to Figure 2.  
Supplementary Figure S3 is associated to Figure 7.  
Supplementary Figure S4 is associated to Figure 8.

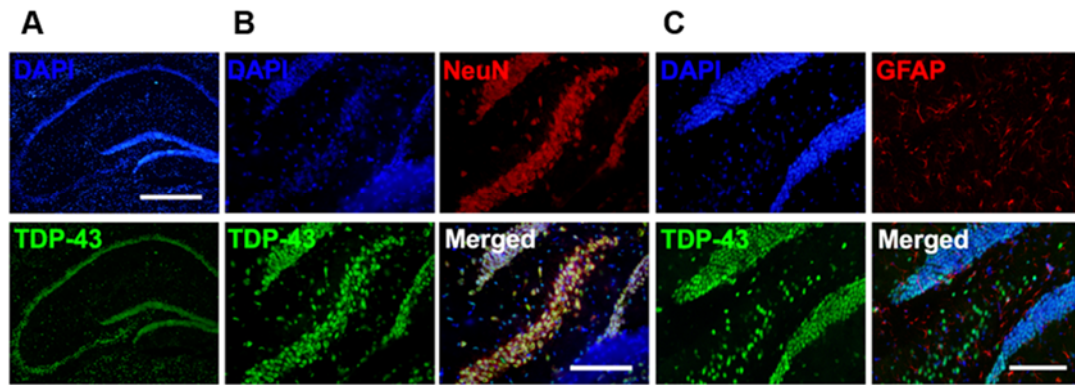

**Supplementary Figure S1.** The expression profile of TDP-43 protein in the mouse CNS. (A) The representative immunofluorescent images showed the distribution of TDP-43 in the mouse CNS, including the cortical layers and the hippocampus. Scale bar: 500  $\mu\text{m}$  (B) The representative images showing the sharp-line signals in the hippocampal area indicated a predominantly somatic localization of TDP-43 by co-staining of TDP-43, neuron marker (NeuN) and nuclear marker (DAPI). Scale bar: 100  $\mu\text{m}$  (C) Co-staining of TDP-43 and glial marker GFAP showing few colocalization.

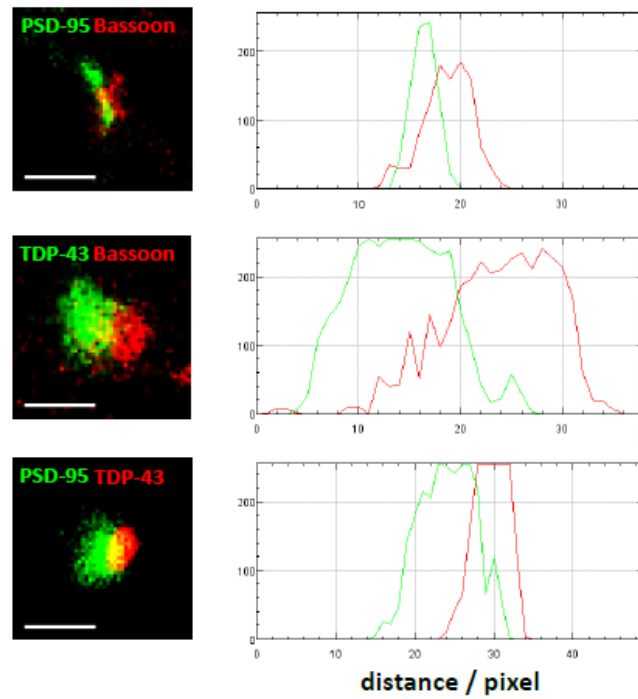

**Supplementary Figure S2.** The localization and measured distances of the respective protein pairs. The representative images and its corresponding histograms were displayed the position of COMs and distance of PSD-95, Bassoon and TDP-43 by calculated from intensity profiles along the transsynaptic axis. Scale bar: 400 nm

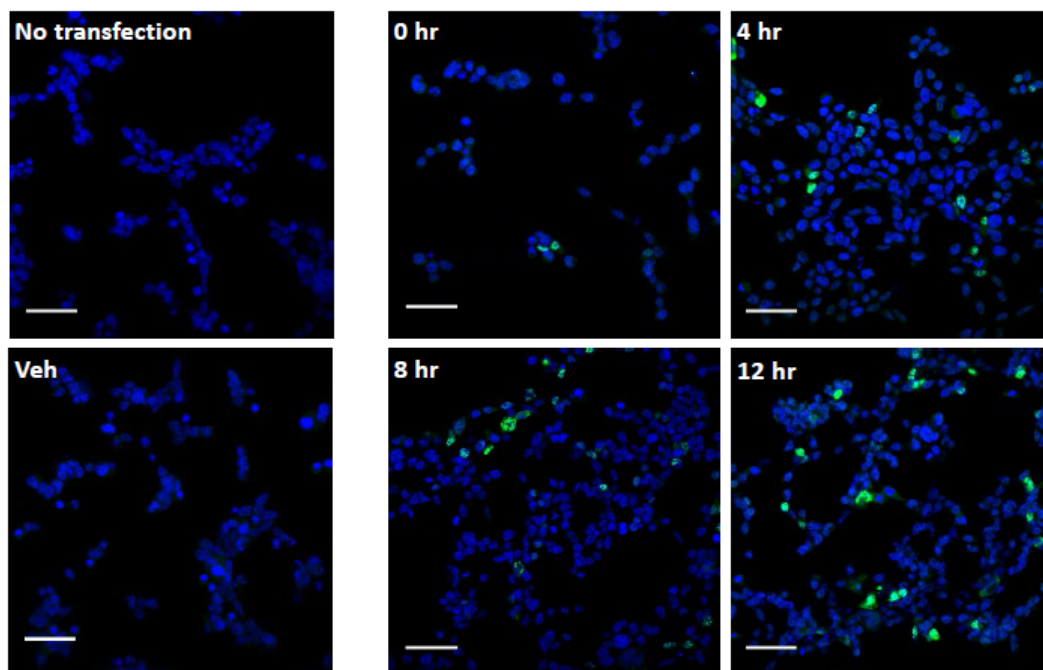

**Supplementary Figure S3.** The time-dependent formation of the pathological TDP-43 inclusions under proteasome inhibitor application. The HEK293T cells with TDP-43-GFP transfection were observed by confocal microscopy at 0, 4, 8 and 12 hours after MG-132 treatment. No transfection and TDP-43-GFP expression HEK 293T cells treated with vehicle (Veh) were served as control group, Scale bar: 100  $\mu$ m

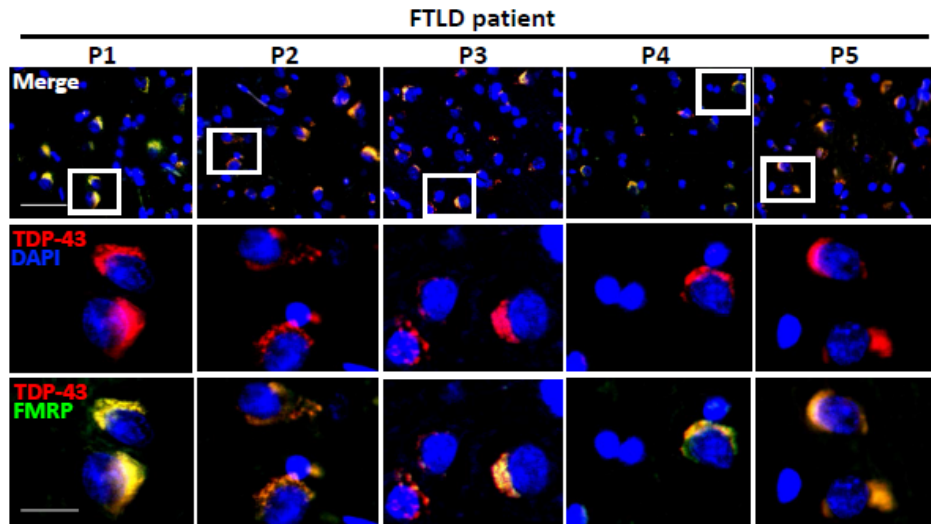

**Supplementary Figure S4.** The cerebral cortex images with TDP-43 and FMRP of all five FTLD-TDP patients. The immunostaining of neuronal mRNP granule marker, FMRP (green), and cytosolic TDP-43 aggregates (Red) were displayed high-degree colocalization (yellow). DAPI was served as nucleus signal. Scale bar: 50  $\mu$ m and 10  $\mu$ m (magnified images).
